# Supplementary material for: Oxygenolytic sulfoquinovose degradation by an iron-dependent alkanesulfonate dioxygenase
Source: PubMed Central journal article supplement — iScience. 2023 Aug 31;26(10):107803. doi: 10.1016/j.isci.2023.107803 (PMC10507154; doi:10.1016/j.isci.2023.107803), 2023-08-31
Supplement: mmc1.pdf [file mmc1.pdf]

**Supplemental information**

**Oxygenolytic sulfoquinovose degradation  
by an iron-dependent  
alkanesulfonate dioxygenase**

**Zonghua Ye, Yifeng Wei, Li Jiang, and Yan Zhang**

## Supporting information

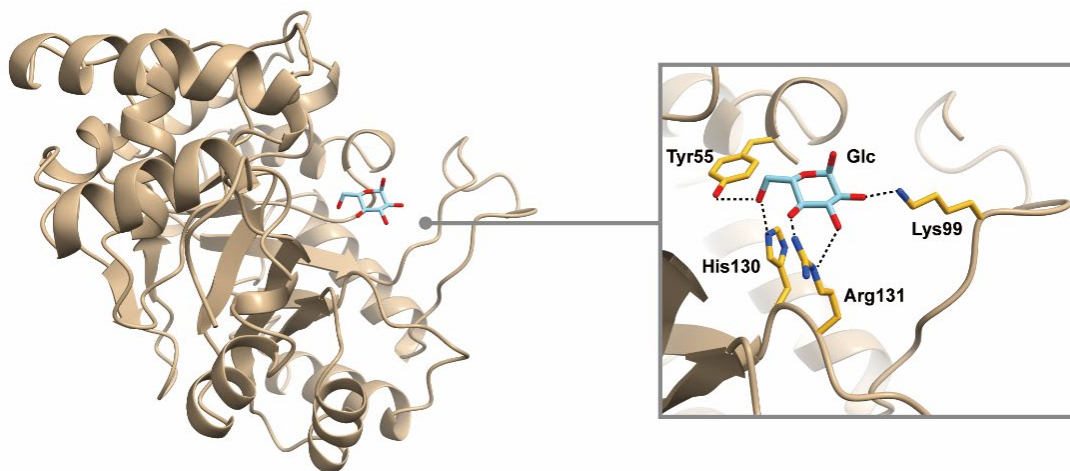

**Figure S1. Related to Figure 4.**

**AlphaFold model of the active site of SquF (UniProt A0A1A9EZ66).** The position of the substrate glucose was estimated by overlaying with the crystal structure of *Agrobacterium tumefaciens* glucose-6-dehydrogenase (PDB 7BC1).

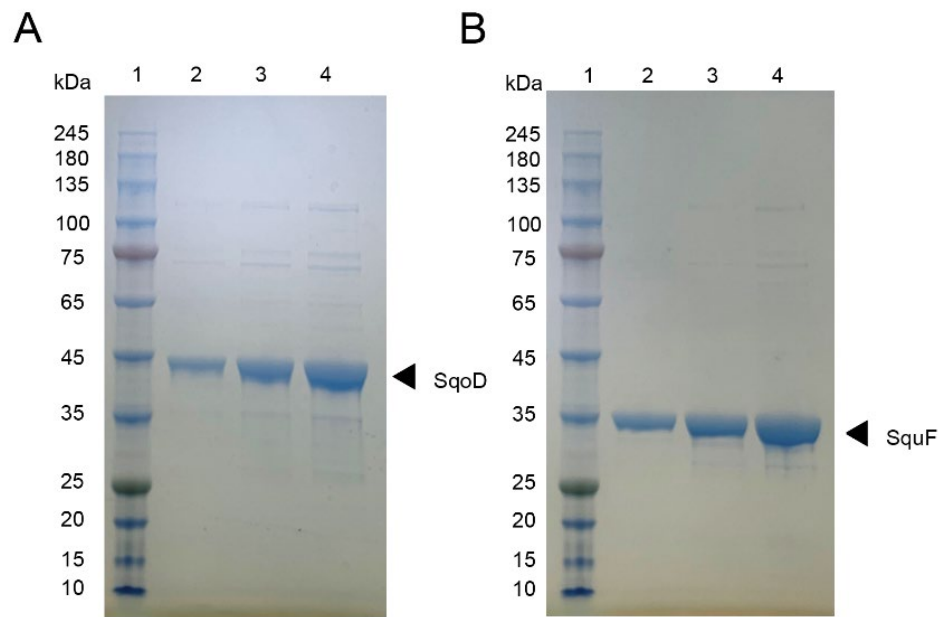

**Figure S2. Related to Figure 1.**

**SDS-PAGE gels.** (A) SDS polyacrylamide gradient gel (8-16%) with: lane 1, protein molecular weight marker (Genstar, Shenzhen); and lane 2-4: 1, 2, 4  $\mu\text{g}$  of the purified protein *MaSsqoD*. (B) SDS polyacrylamide gradient gel (8-16%) with: lane 1, protein molecular weight marker; and lane 2-4: 1, 2, 4  $\mu\text{g}$  of the purified protein *MaSsquF*.

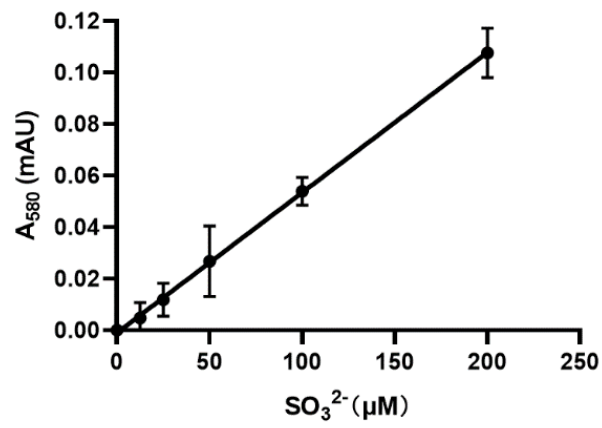

**Figure S3. Related to Figure 2 and Figure 5.**

**Standard curve of sulfite.** Serial dilutions of sodium sulfite (200, 100, 50, 25, 12.5, 0  $\mu\text{M}$ ) were used to establish a standard curve as a reference. Data are represented as mean  $\pm$  SD.

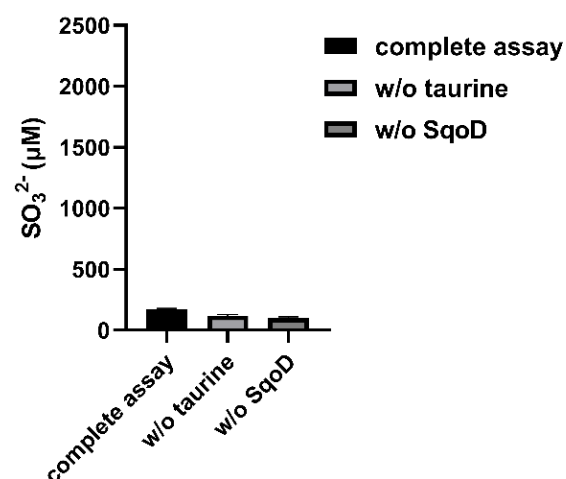

**Figure S4. Related to Figure 2.**

**Detection of sulfite formation in the *MaSqoD*-catalyzed taurine cleavage by a colorimetric Fuchsin assay.** No sulfite release was detected when SQ was replaced with taurine as the sulfonate substrate. Data are represented as mean  $\pm$  SD.

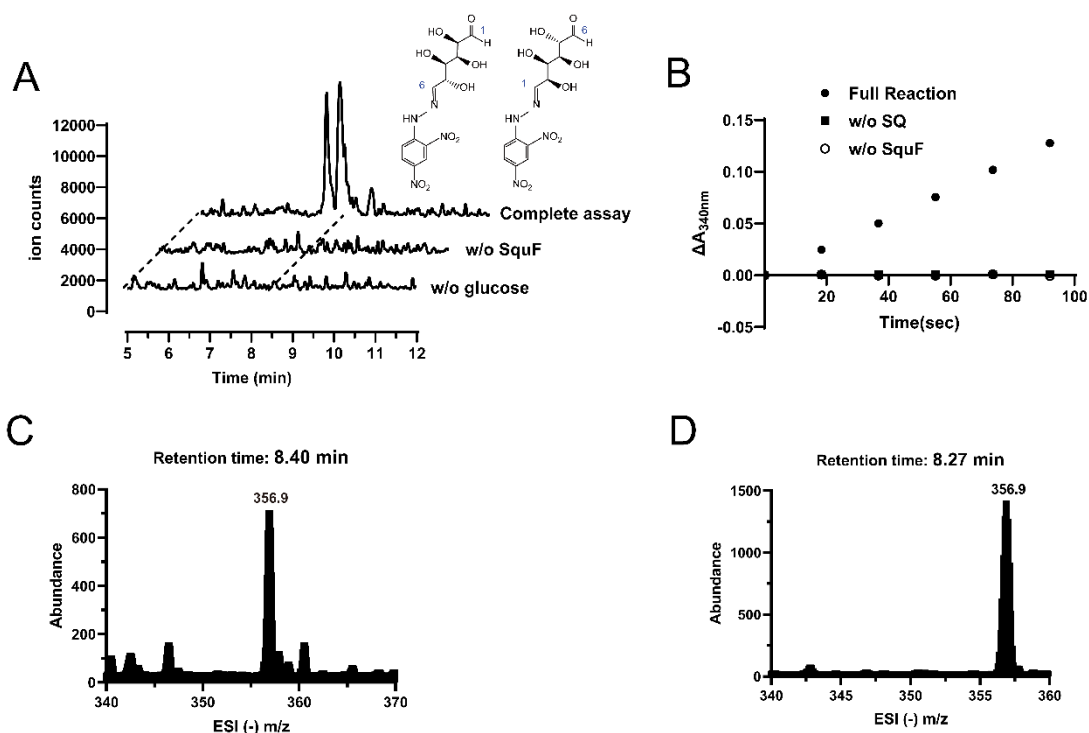

**Figure S5. Related to Figure 3.**

**Glucose-6-dehydrogenase assays of purified *MaSquF*.** (A) Extracted ion chromatograms (m/z (-) 356.9, the predicted mass of DNPH-6-dehydroglucose monoanion) of the DNPH derivatized products of the *MaSquF* reaction. (B) Spectrophotometric activity assay monitoring NADPH formation accompanying glucose oxidation by *MaSquF*. (C-D) ESI (-) m/z spectrum of the DNPH-6-dehydroglucose peaks in (A).

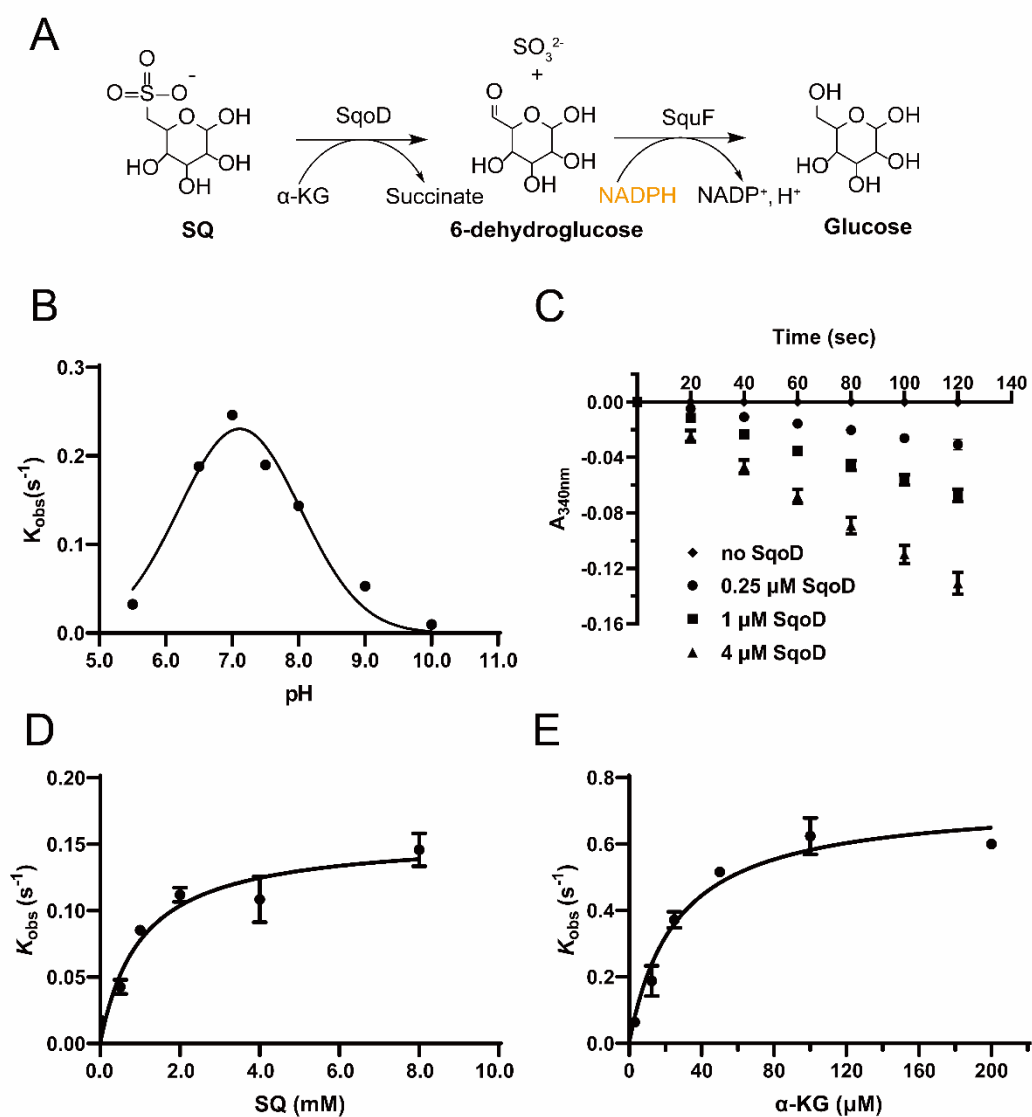

**Figure S6. Related to Figure 1.**

**SquF-coupled enzyme activity assays for SquoD.** (A) The mechanism for SquF-coupled enzyme activity assay. (B) pH-dependence of the SquoD-catalyzed reaction. (C) SquoD dose-dependent assays. (D-E) Michaelis-Menten plot for SQ or  $\alpha$ KG as the substrate. The error bars represent the standard deviation of three individual experiments. Data are represented as mean  $\pm$  SD.

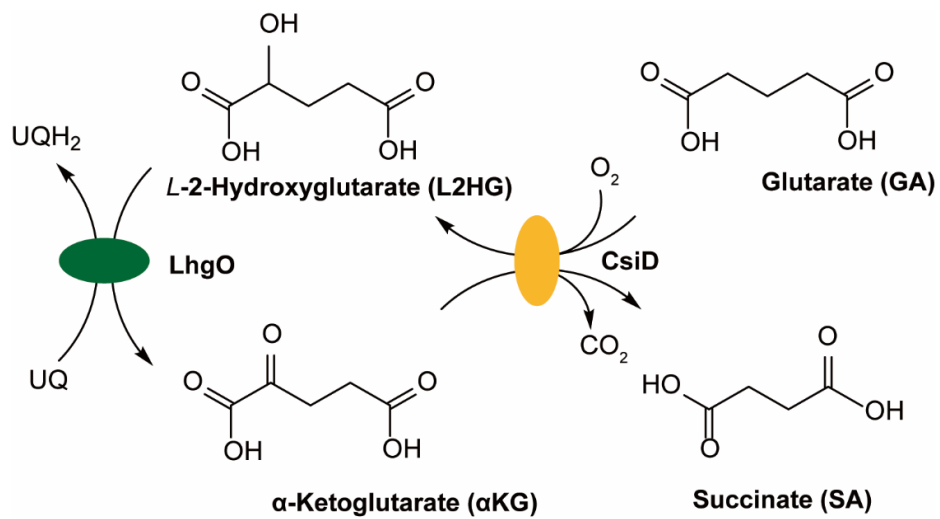

**Figure S7. Related to Figure 1.**

**The Fe/αKG-dependent dioxygenase (CsiD) in *E. coli* lysine degradation**

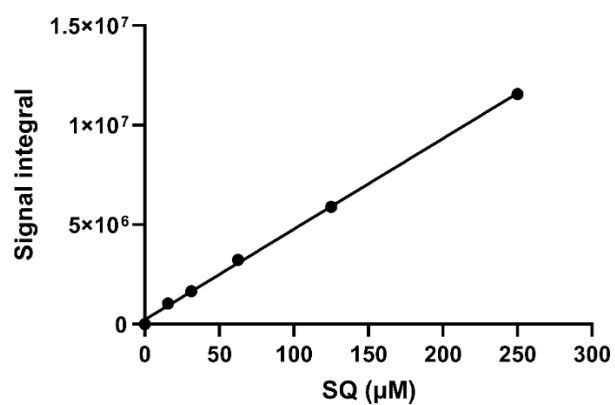

**Figure S8. Related to Figure 5.**

**The standard curve of SQ by LC-MS.** Serial dilutions of SQ (250, 125, 62.5, 31.2, 15.6, 0 μM) were used to establish a standard curve as a reference. The standard curve was established by integrals of the EIC peaks.

**Table S1. Related to Figure 1.**

**The Pfam codes and information for the relevant genes in the text.**

| <b>Pfam code</b> | <b>Protein</b> | <b>Organism</b>                  | <b>Locus tag</b> | <b>UniProt</b> | <b>PDB</b> |
|------------------|----------------|----------------------------------|------------------|----------------|------------|
| PF00296          | SquD/SmoC      | <i>Agrobacterium tumefaciens</i> | Atu3279          | A9CEY7         | /          |
| PF00248          | SquF/SmoB      | <i>Agrobacterium tumefaciens</i> | Atu3278          | A9CEY6         | 7BC1       |
|                  |                | <i>Marinobacterium aestuarii</i> | A8C75_10870      | A0A1A9EZ66     | /          |
| PF02668          | TauD           | <i>Escherichia coli</i>          | JW0360           | P37610         | 1OS7       |
|                  | SqoD           | <i>Marinobacterium aestuarii</i> | A8C75_10885      | A0A1A9EZ58     | /          |

**Table S2. Related to Figure 5.**

**Primers used for qPCR experiments.**

| <b>Primer name</b> | <b>Primer sequence 5'-3'</b> |
|--------------------|------------------------------|
| F-Mu-TauD          | GTTTTATTCCGCGGATTCCCTG       |
| R-Mu-TauD          | GTCACTTGTGTTCTTGGTGCTG       |
| F-Mu-SquF          | GCGCTTGTTGCAATCTCACA         |
| R-Mu-SquF          | AATCCGTCTAGCTGTATCGCTG       |
| F-16S rRNA         | CAATGGCGTATACAAAGGGCTG       |
| R-16S rRNA         | CCACGATTACTAGCGATTCCGA       |
